# Supplementary material
Source: PubMed Central journal article supplement (PMC548562)

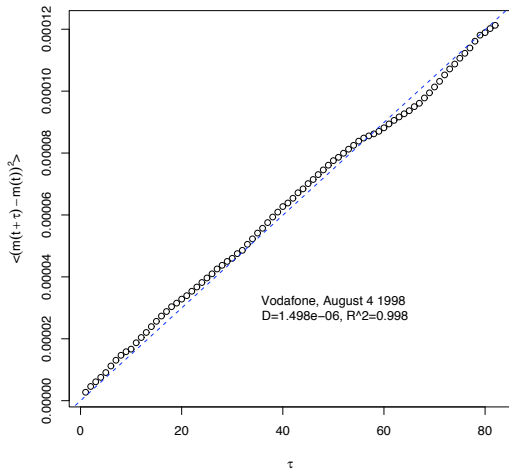

Supplement: pnas_102_6_2254__2.pdf [file pnas_102_6_2254__2.pdf]

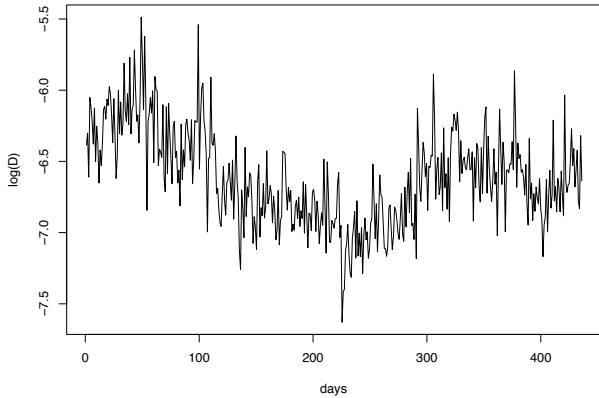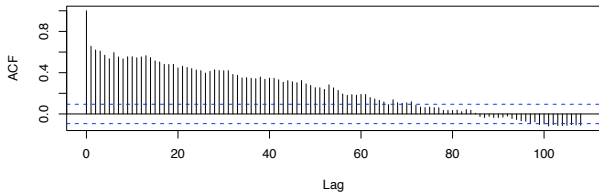

Supplement: pnas_102_6_2254__3.pdf [file pnas_102_6_2254__3.pdf]

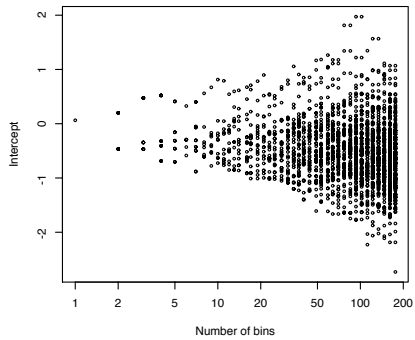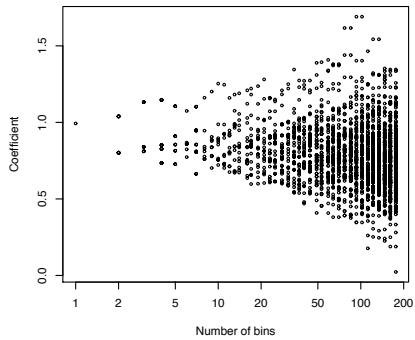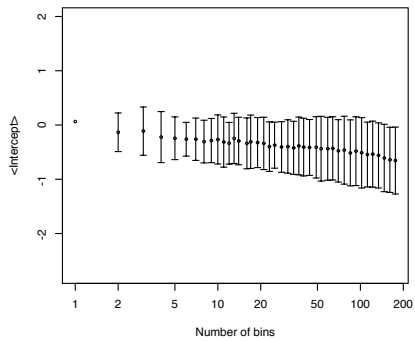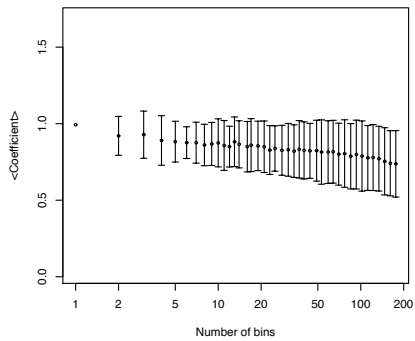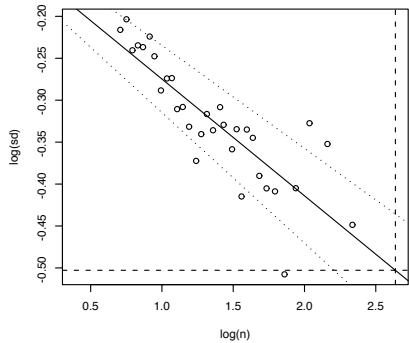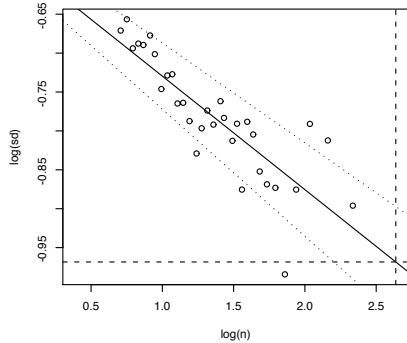

Supplement: pnas_102_6_2254__4.pdf [file pnas_102_6_2254__4.pdf]

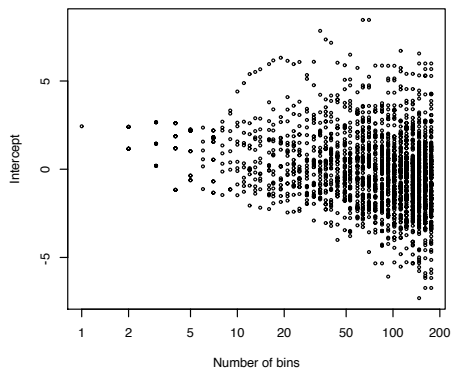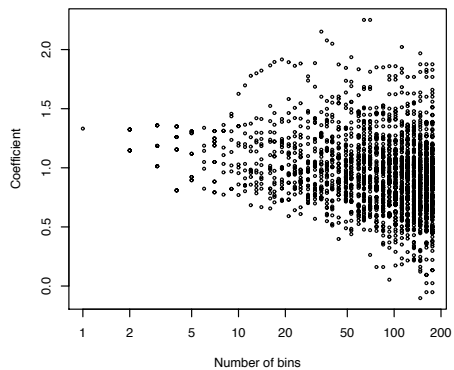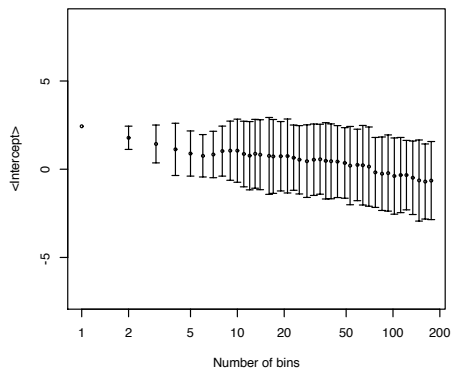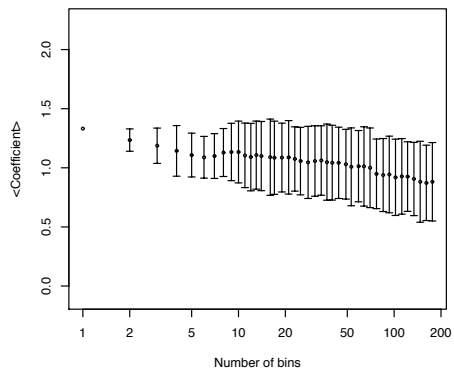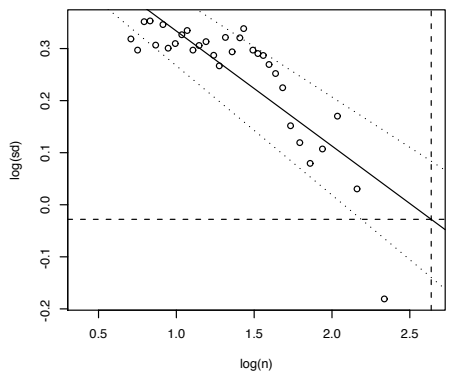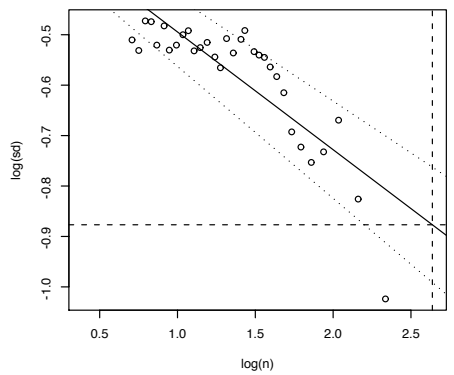

Supplement: pnas_102_6_2254__5.pdf [file pnas_102_6_2254__5.pdf]

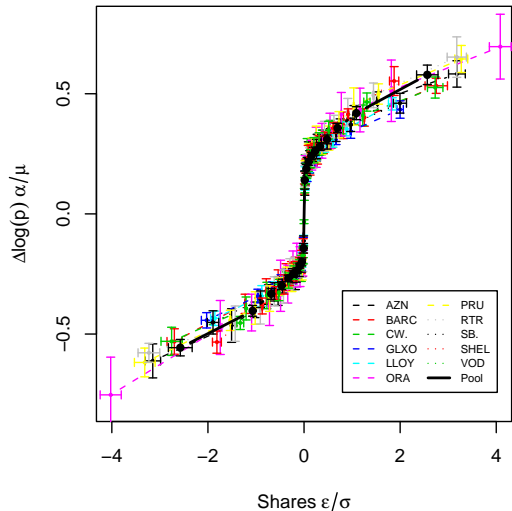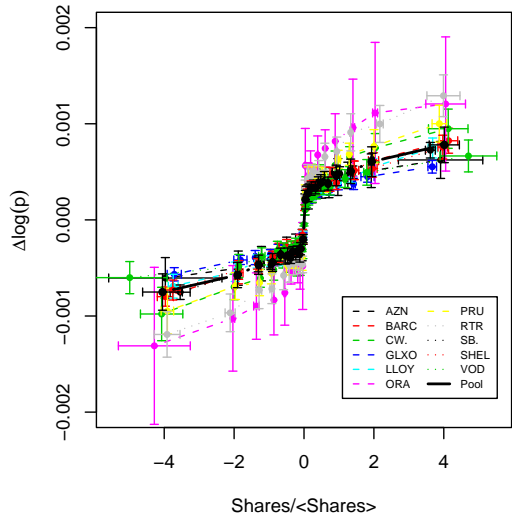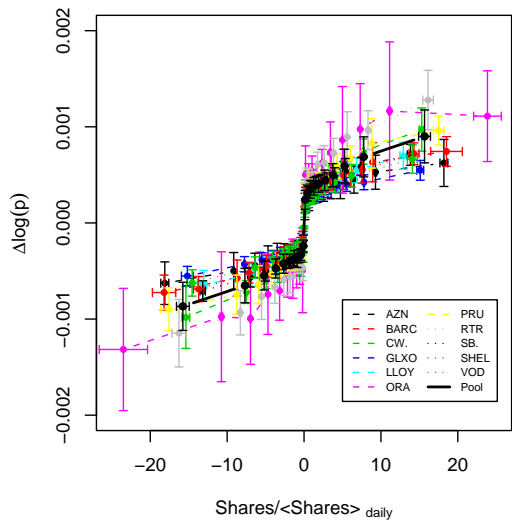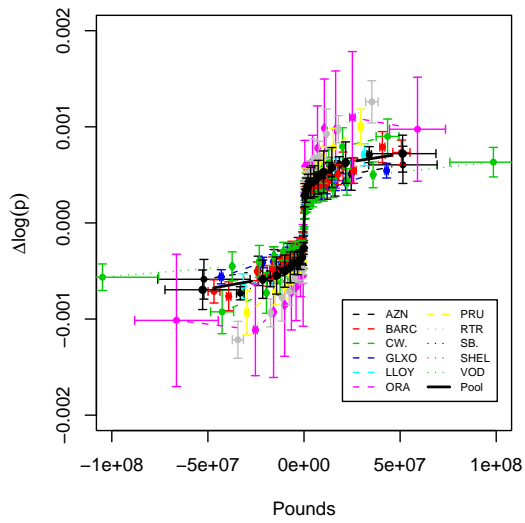

Supplement: pnas_102_6_2254__6.pdf [file pnas_102_6_2254__6.pdf]

slope=-0.35

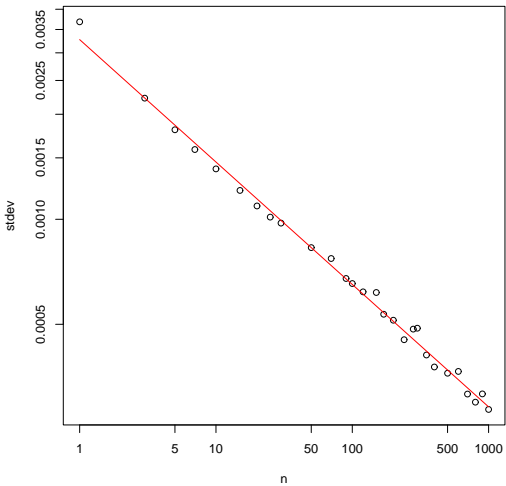

Supplement: pnas_102_6_2254__7.pdf [file pnas_102_6_2254__7.pdf]

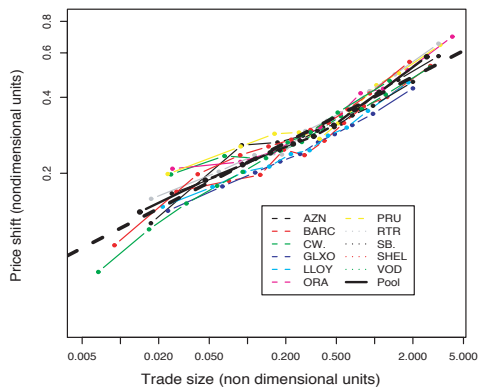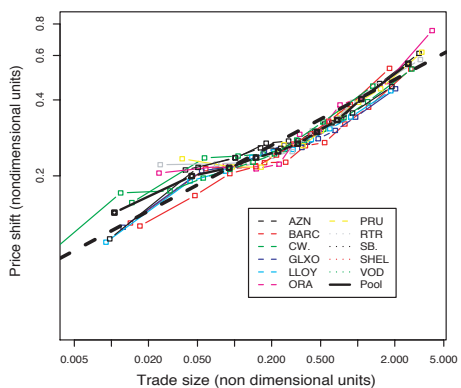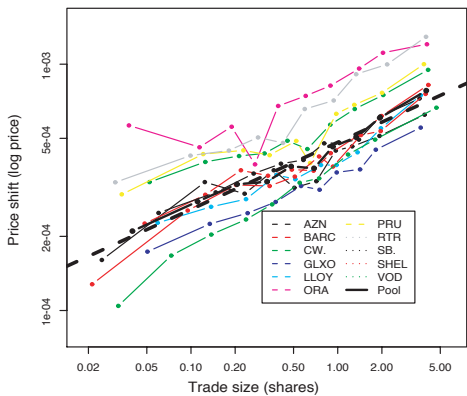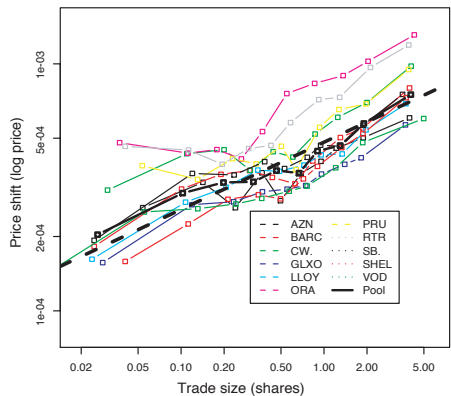

Supplement: pnas_102_6_2254__8.pdf [file pnas_102_6_2254__8.pdf]
